# Supplementary material for: Visible range optical absorption, Urbach energy estimation and paramagnetic response in Cr-doped TiO2 nanocrystals derived by a sol–gel method
Source: Royal Society of Chemistry journal article supplement (doi:10.1039/c9cp01351b), 2019-01-01
Supplement: c9cp01351b1.pdf [file c9cp01351b1.pdf]

## Supporting information

### **Visible Range Optical Absorption, Urbach Energy Estimation and Paramagnetic Response in Cr-Doped TiO<sub>2</sub> Nanocrystals Derived by Sol-Gel Method**

V. R. Akshay<sup>1,2</sup>, B. Arun<sup>1,2</sup>, Guruprasad Mandal<sup>3</sup> and M.Vasundhara<sup>1,2\*</sup>

<sup>1</sup>Materials Science and Technology Division, CSIR-National Institute for Interdisciplinary Science and Technology, Trivandrum -695 019, India.

<sup>2</sup>Academy of Scientific and Innovative Research (AcSIR), CSIR-Human Resource Development Centre, Ghaziabad, Uttarpradesh, India.

<sup>3</sup>Centre for Rural and Cryogenic Technologies, Jadavpur University, Kolkata-700032

\*Corresponding author: [mvas@niist.res.in](mailto:mvas@niist.res.in), [vasu.mutta@gmail.com](mailto:vasu.mutta@gmail.com)

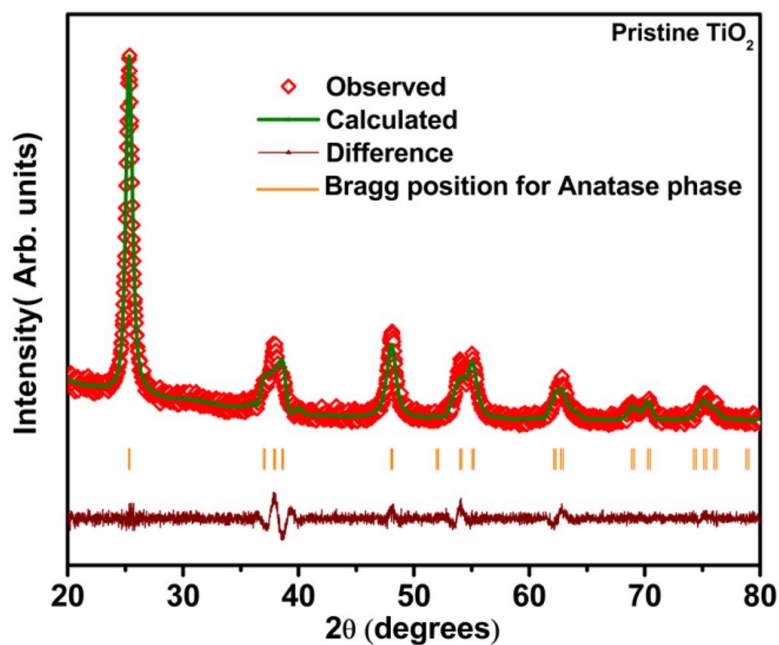

Figure S1. Refined XRD patterns of Pristine TiO<sub>2</sub> nanocrystals

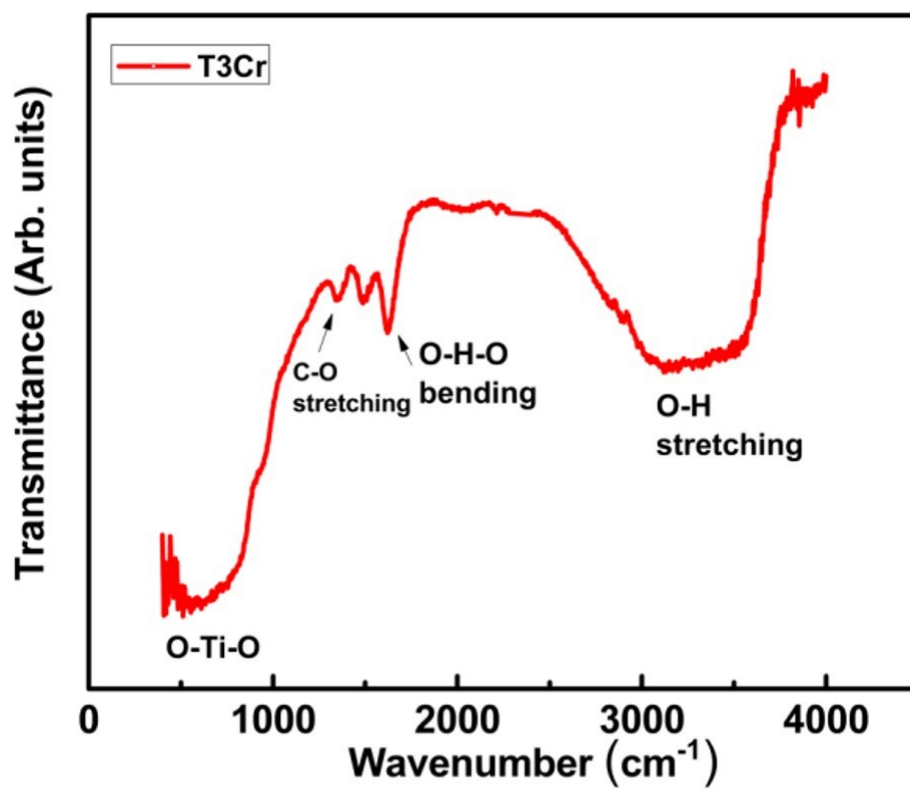

Figure S2. FTIR spectra of T3Cr

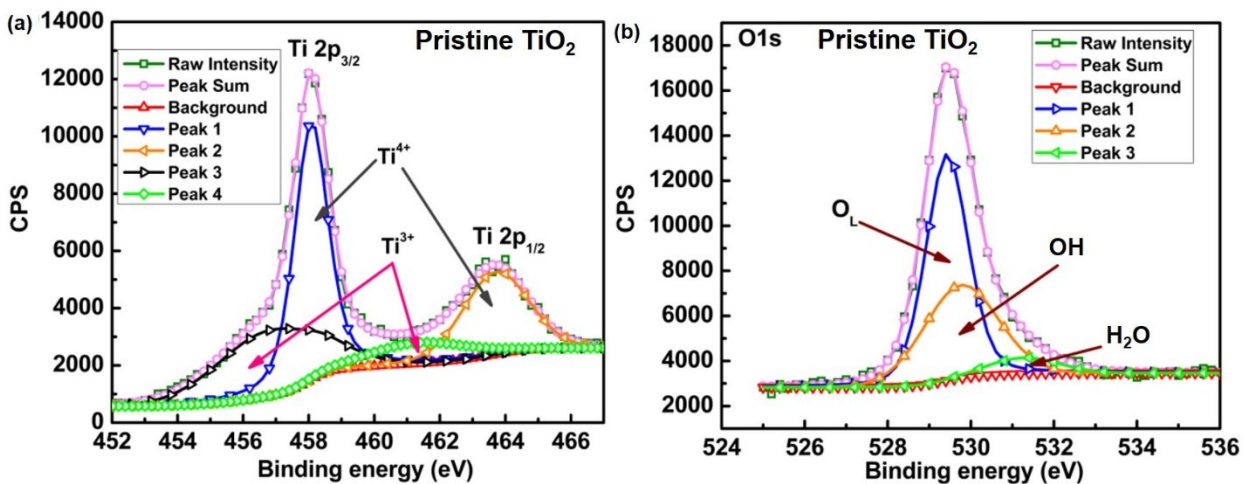

Figure S3. (a) High resolution XPS spectra of (a) Ti 2p and (b) O 1s of Pristine TiO<sub>2</sub>

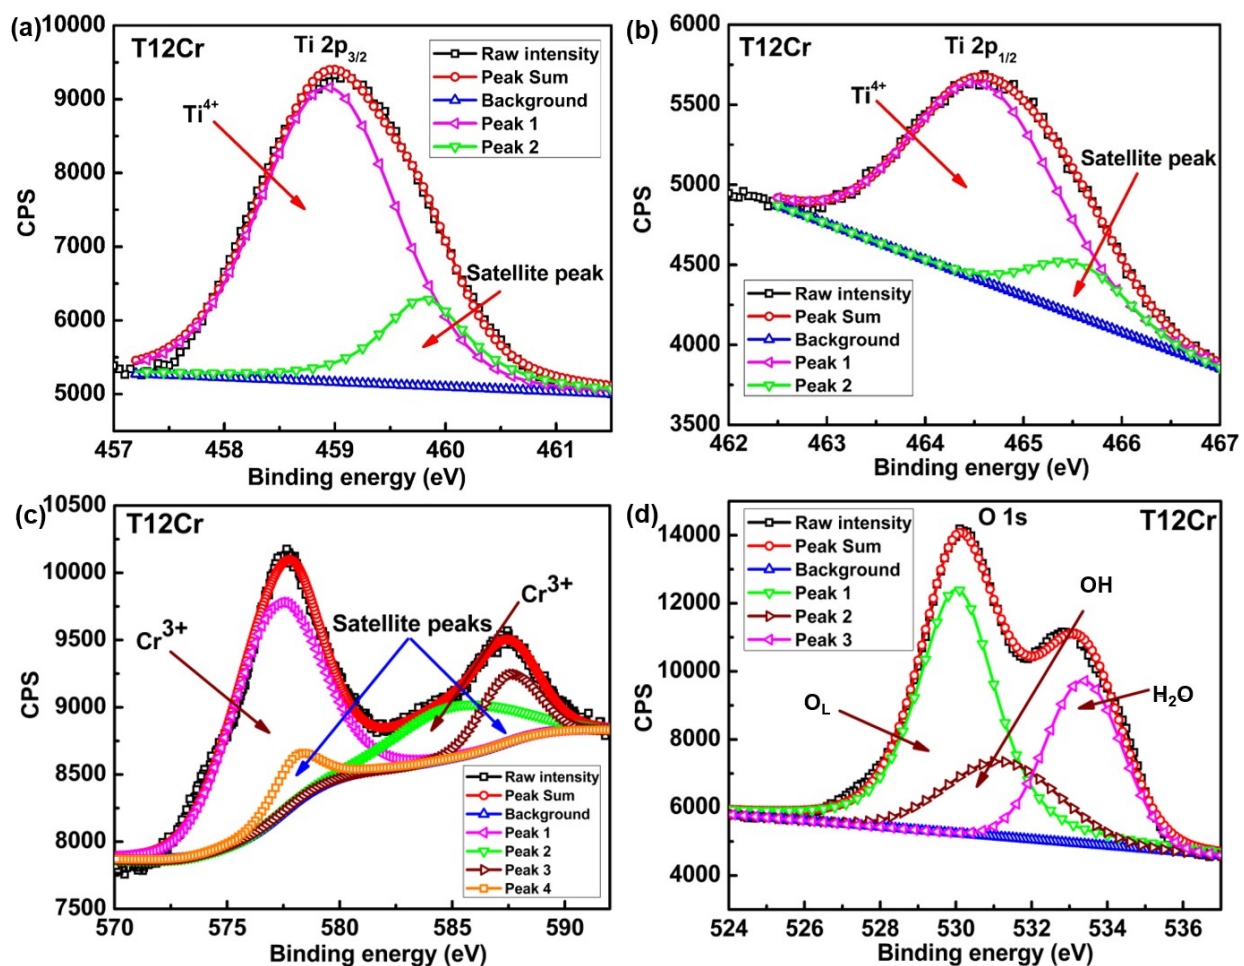

Figure S4. High resolution spectra of (a) Ti 2p<sub>3/2</sub>, (b) Ti 2p<sub>1/2</sub> (c) Cr 2p, and (d) O 1s of T12Cr.

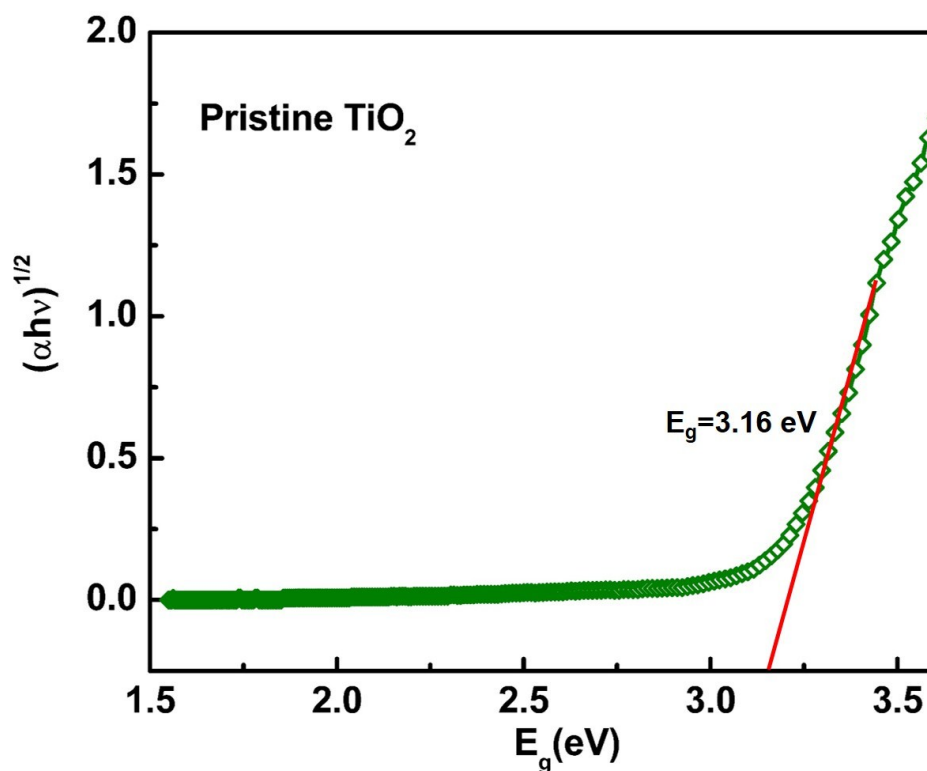

Figure S5. Band Gap estimated from UV spectra of Pristine TiO<sub>2</sub>

**Table S1:** Amount of precursor compounds for the synthesis of Cr-doped TiO<sub>2</sub> nanocrystals (in 8 ml ethanol)

| Sample | Amount of C <sub>16</sub> H <sub>36</sub> O <sub>4</sub> Ti (g) | Amount of CrN <sub>3</sub> O <sub>9</sub> .9H <sub>2</sub> O (g) |
|--------|-----------------------------------------------------------------|------------------------------------------------------------------|
| T3Cr   | 7.3414                                                          | 0.2670                                                           |
| T6Cr   | 7.1034                                                          | 0.5331                                                           |
| T9Cr   | 6.8661                                                          | 0.7984                                                           |
| T12Cr  | 6.6296                                                          | 1.0628                                                           |

**Table S2:** Position of (101) peak in pristine and Cr-doped TiO<sub>2</sub>

| <b>Sample</b> | <b>Position of (101) peak<br/>(degrees)</b> |
|---------------|---------------------------------------------|
| TP            | 25.3713                                     |
| T3Cr          | 25.3690                                     |
| T6Cr          | 25.3622                                     |
| T9Cr          | 25.3214                                     |
| T12Cr         | 25.3146                                     |

**Table S3:** ED-XRFS data obtained for T3Cr, T6Cr, T9Cr and T12Cr

| <b>Sample</b> | <b>Percentage of elemental oxide</b>                          |
|---------------|---------------------------------------------------------------|
| T3Cr          | 97.2% TiO <sub>2</sub> + 2.8% Cr <sub>2</sub> O <sub>3</sub>  |
| T6Cr          | 94.3% TiO <sub>2</sub> + 5.7% Cr <sub>2</sub> O <sub>3</sub>  |
| T9Cr          | 91.4% TiO <sub>2</sub> + 8.6% Cr <sub>2</sub> O <sub>3</sub>  |
| T12Cr         | 88.2% TiO <sub>2</sub> + 11.8% Cr <sub>2</sub> O <sub>3</sub> |
